# Supplementary material
Source: PubMed Central journal article supplement (PMC10841703)

**Supplemental Figure.** Rash examples. Patient 1: (1a) Newborn rash in 3-week-old with family history; (1b) No eczema at 13 months on TMP/SMX and chlorhexidine washes. Patient 2 (2) Four-year-old with family history. Minimal rash on TMP/SMX and chlorhexidine. Patient 3: Proband diagnosed at 2 years, on antibiotic prophylaxis since age 5 with facial eczema at 7 years (3a); Dupilumab-related improvement at 10 years (3b).

Journal Pre-proof

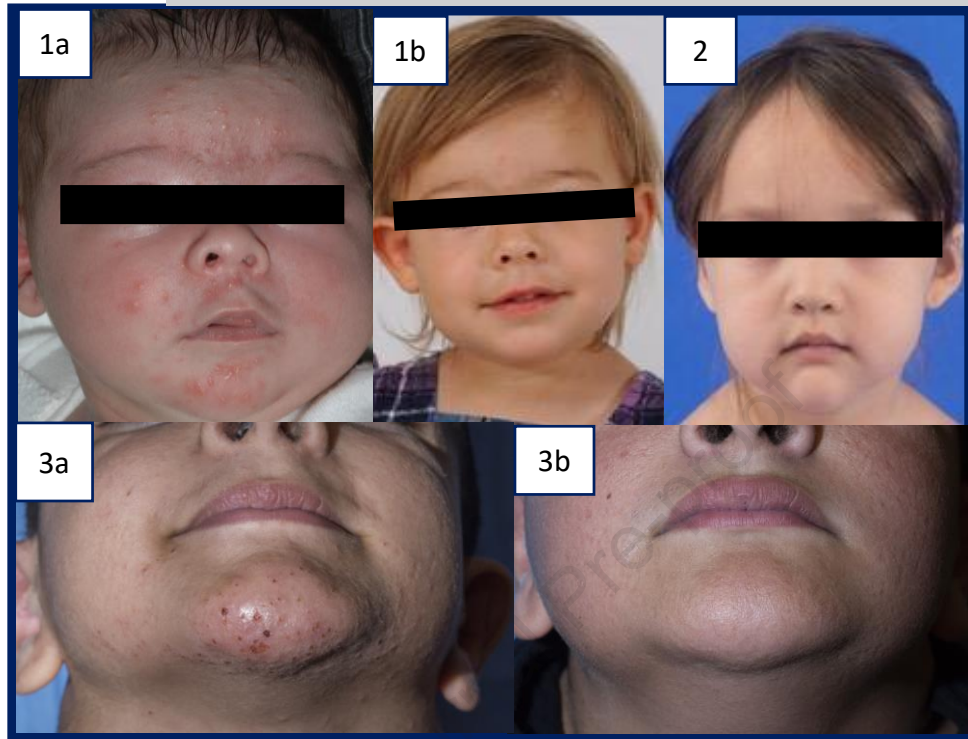

Supplement: NIHMS1935371-supplement-1.pdf [file NIHMS1935371-supplement-1.pdf]
